# Supplementary material
Source: PubMed Central journal article supplement (PMC1685858)
Supplement: rspb20063713s08.pdf [file rspb20063713s08.pdf]

**Appendix 1:** Results of the principal components analysis summarizing the climatic variation throughout 12 months and 28 years (1991-2003) in the alpine area of the Sierra de Guadarrama (data from Navacerrada pass; 1890 m a.s.l.). The sample unit is the monthly value per year (n=336). Factor loadings that are highly significant ( $p < 0.001$ ) are marked in bold type.

| Monthly values or averages                   | PC1          | PC2          | PC3          | PC4         | PC5          | PC6         |
|----------------------------------------------|--------------|--------------|--------------|-------------|--------------|-------------|
| Average cloudyness index                     | <b>-0.47</b> | <b>-0.60</b> | <b>0.40</b>  | 0.05        | <b>-0.36</b> | -0.03       |
| Number of sunny days                         | 0.29         | <b>0.75</b>  | -0.18        | -0.18       | <b>0.34</b>  | 0.06        |
| Number of cloudy days                        | <b>-0.54</b> | <b>-0.47</b> | <b>0.50</b>  | -0.06       | <b>-0.35</b> | -0.04       |
| Average sun radiation index                  | <b>0.69</b>  | <b>0.46</b>  | <b>-0.43</b> | 0.11        | 0.14         | -0.03       |
| Average relative humidity                    | <b>-0.61</b> | <b>-0.54</b> | <b>0.43</b>  | -0.03       | -0.25        | -0.03       |
| Average barometric pressure                  | <b>0.43</b>  | 0.21         | <b>-0.38</b> | 0.00        | <b>0.73</b>  | -0.02       |
| Average temperature                          | <b>0.91</b>  | 0.27         | -0.25        | 0.10        | 0.10         | -0.02       |
| Average maximum temperature                  | <b>0.90</b>  | 0.29         | -0.28        | 0.10        | 0.10         | 0.00        |
| Number of days with max. temperature >25°C   | <b>0.54</b>  | <b>0.63</b>  | -0.08        | -0.03       | -0.01        | -0.07       |
| Average minimum temperature                  | <b>0.93</b>  | 0.24         | -0.20        | 0.10        | 0.10         | -0.04       |
| Number of days with min. temperature <-5°C   | <b>-0.83</b> | 0.10         | -0.03        | -0.05       | -0.07        | -0.11       |
| Precipitation                                | -0.21        | -0.31        | <b>0.83</b>  | 0.04        | -0.25        | 0.05        |
| Number of days with rainfall                 | <b>0.50</b>  | <b>-0.72</b> | 0.21         | 0.02        | 0.03         | 0.05        |
| Number of days with snowfall                 | <b>-0.78</b> | -0.03        | <b>0.31</b>  | -0.01       | <b>-0.34</b> | -0.07       |
| Number of days with hail                     | 0.12         | -0.01        | 0.04         | <b>0.88</b> | -0.08        | 0.11        |
| Number of days with storms                   | <b>0.50</b>  | -0.14        | -0.12        | <b>0.68</b> | 0.03         | -0.09       |
| Number of days with mist                     | -0.21        | -0.04        | 0.22         | 0.04        | -0.03        | <b>0.77</b> |
| Number of days with dew                      | <b>0.40</b>  | -0.07        | -0.21        | 0.05        | 0.00         | <b>0.67</b> |
| Number of days with snow covering the ground | <b>-0.87</b> | 0.11         | 0.07         | -0.02       | -0.08        | -0.08       |
| Average wind speed                           | -0.15        | -0.15        | <b>0.36</b>  | -0.14       | 0.09         | 0.19        |
| Eigenvalue                                   | 7.28         | 2.99         | 2.21         | 1.36        | 1.22         | 1.15        |
| Percentage of explained variance             | 36.38        | 14.94        | 11.06        | 6.80        | 6.11         | 5.74        |
